# Supplementary material
Source: MDPI journal article supplement (https://www.mdpi.com/2073-4395/13/9/2402)
Supplement: s1 [file s1]

# Supplemental Figure S1. Histogram and Phenotypic distributions of the predicted (BLUP) values for all traits of recombinant inbred lines (RIL) at individual environments.

Environments: Texas A&M AgriLife Research stations in Bushland, TX in 2019, 2020, and 2021, in McGregor, TX in 2019 and 2020, in College Station, TX in 2019 and 2020.

Environments A) College Station 2019 (19CS), B) McGregor 2019 (19MCG), C) College Station 2020 (20CS), D) McGregor 2020 (20MCG), E) Emny land in Bushland 2020 (20EMN), F) Bushland South Pivot in Bushland 2019 (19BSP), and G) Bushland Dryland 2021 (21BD).

Traits: Heading date (HD), Plant height (PH), Grain yield from combine harvester (YLD), Single kernel weight (SKW), Kernel diameter (DIAM), Spikes m<sup>-2</sup> (SPM), Biomass (BM), Biomass grain yield from 0.5-meter inner row (BMYLD), Kernel area (KAREA), Thousand kernel weight (TKW), Harvest index (HI), Kernel perimeter (KPERI), Kernel hardness index (KHI), Kernel length (KLEN), Kernel width (KWID), Kernels spike<sup>-1</sup> (KPS), Single head dry weight (SHDW), Single Stem Weight (SSW), Single head grain weight (SHGW).

## A) 19CS

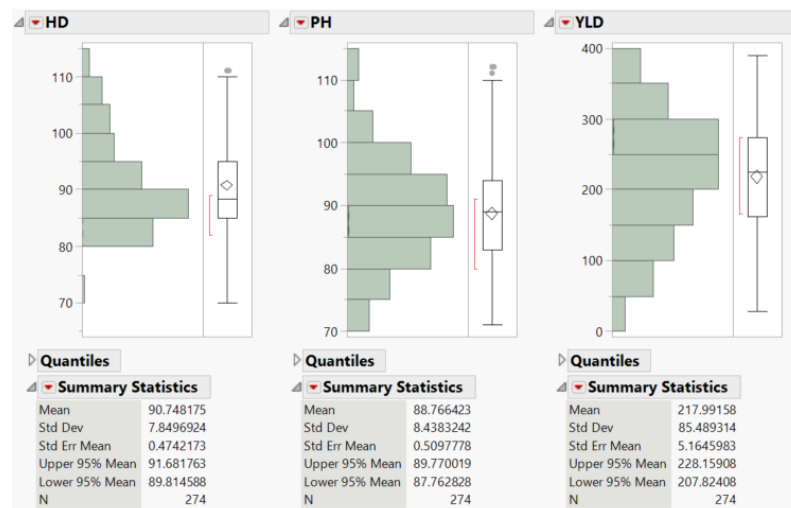

## B) 19MCG

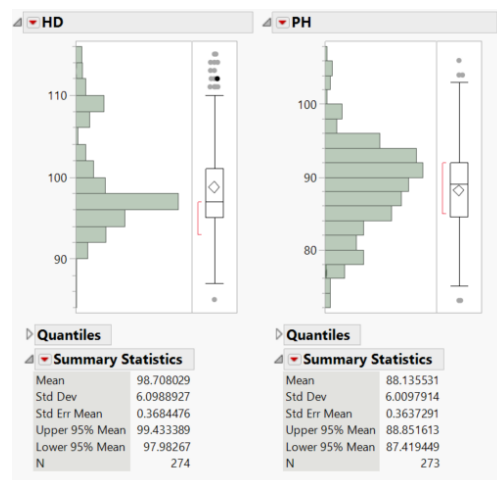

### C) 20CS

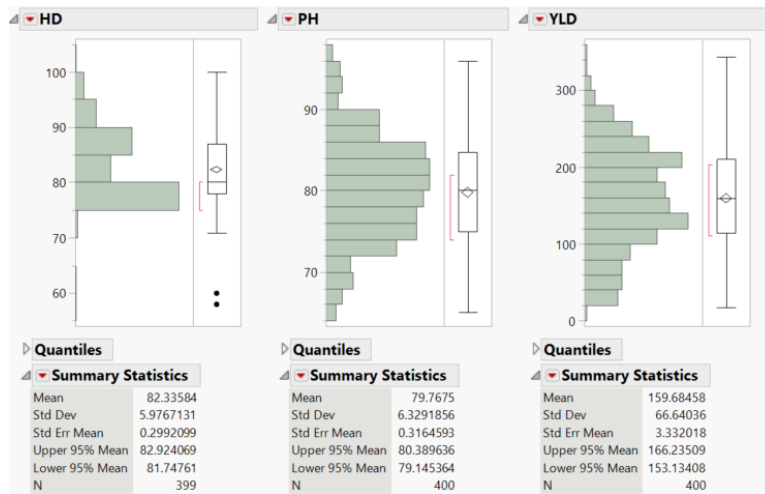

### D) 20MCG

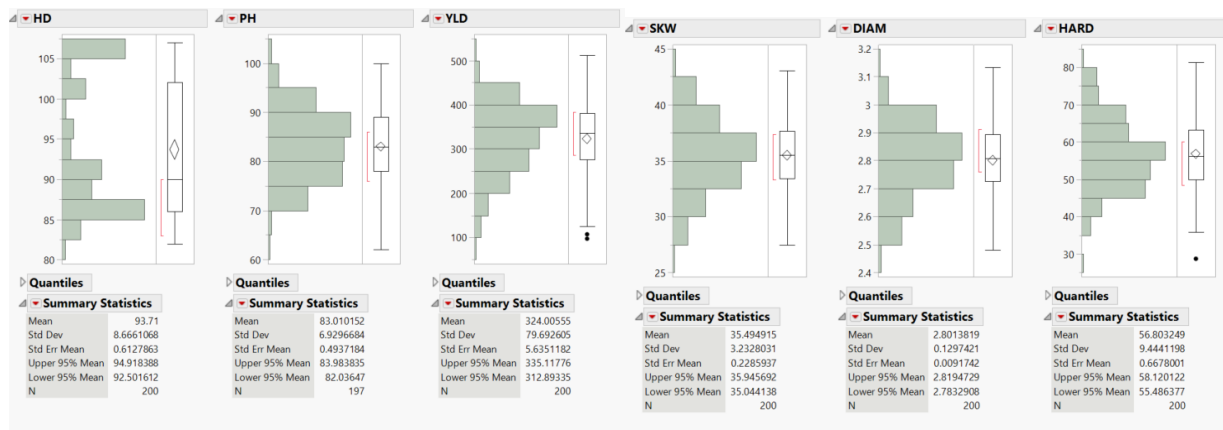

### E) 20EMN

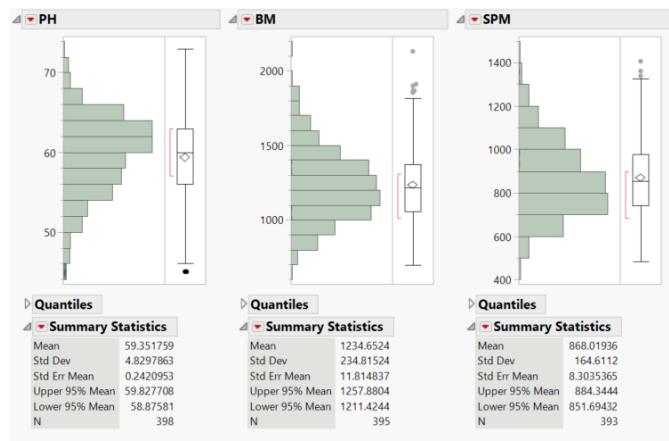

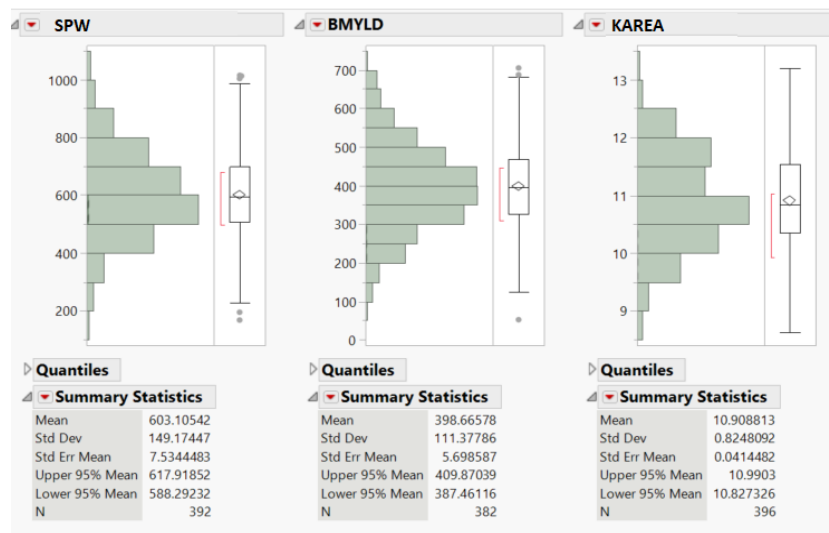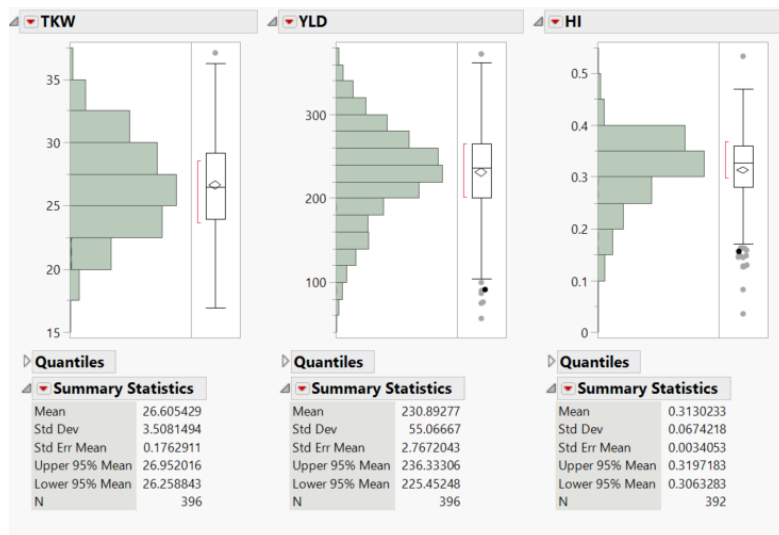

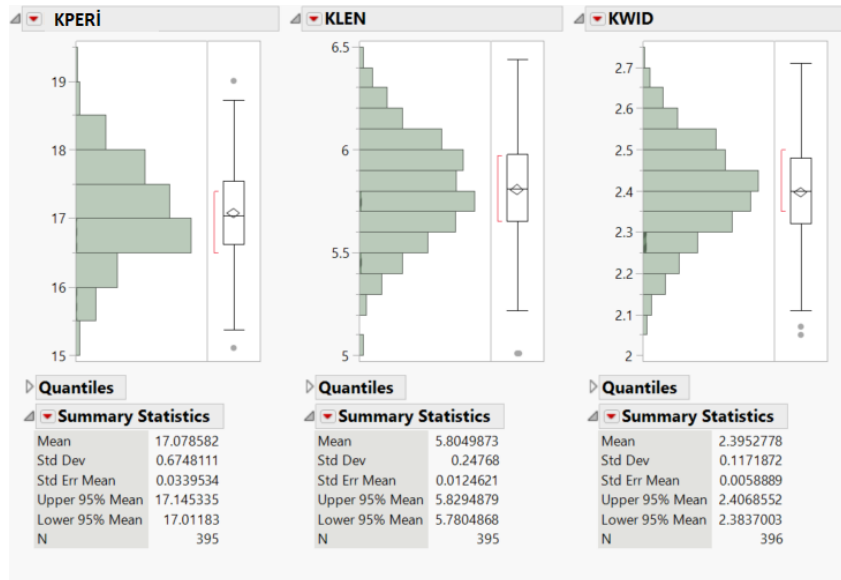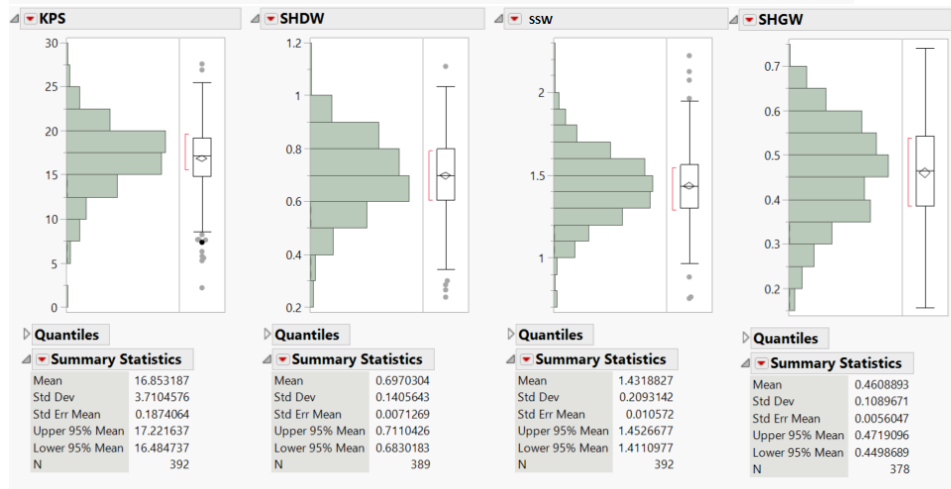



# F) 19BSP

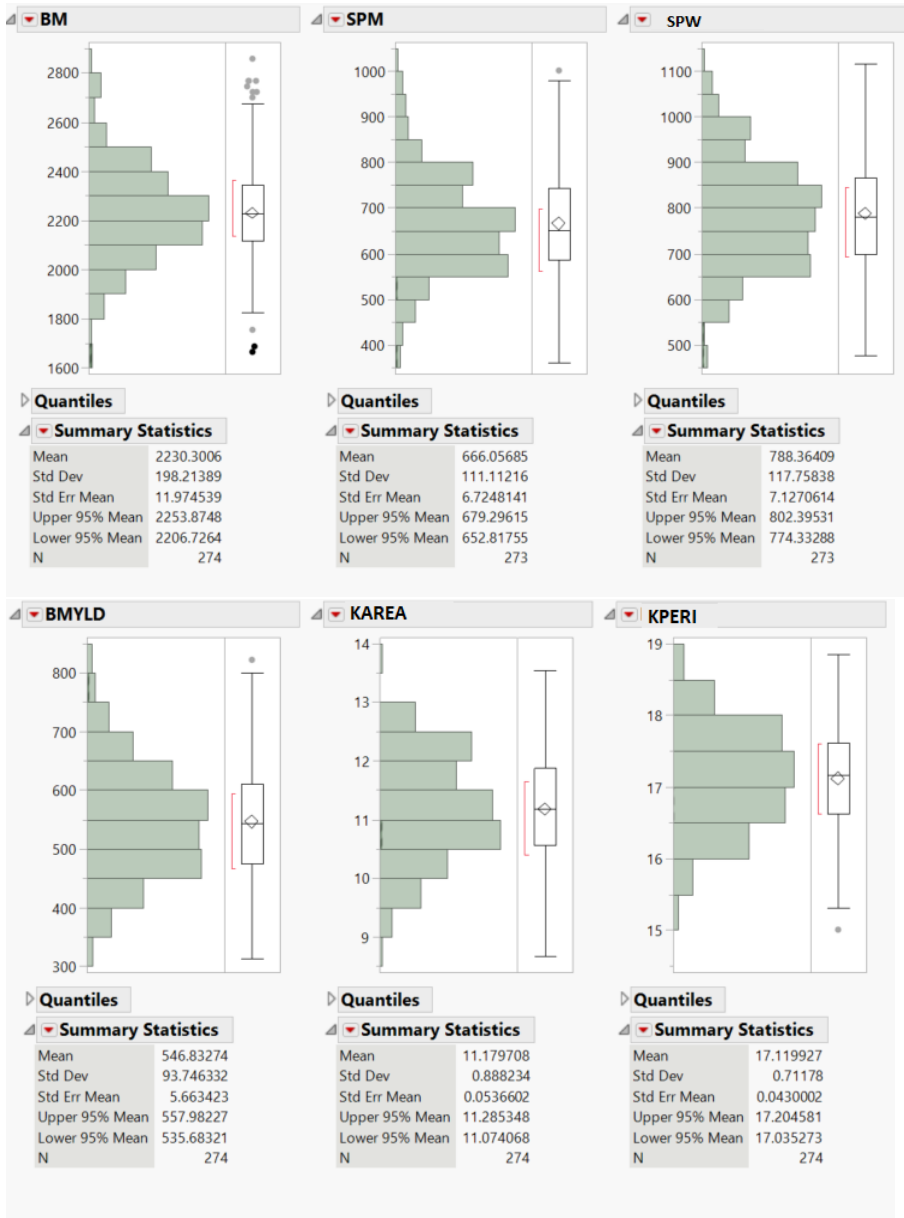

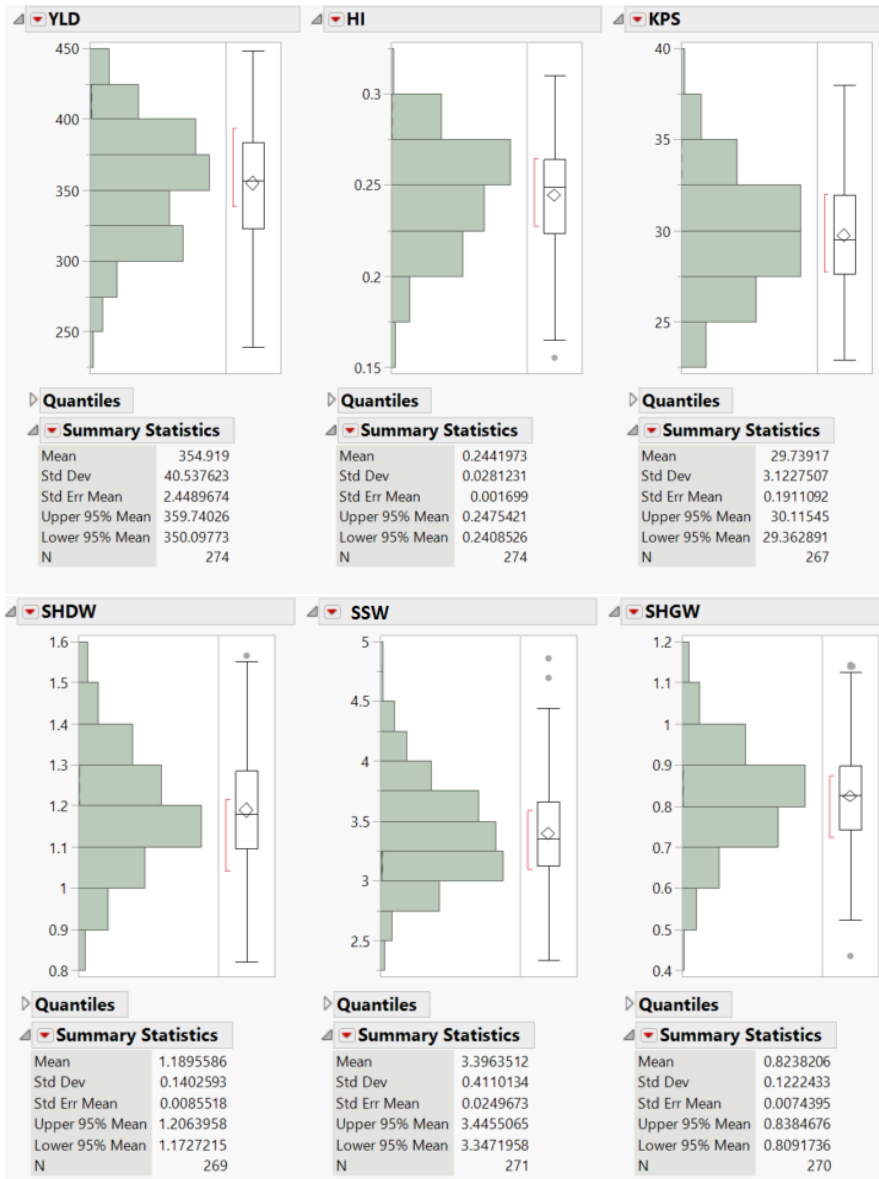

G) 21BD

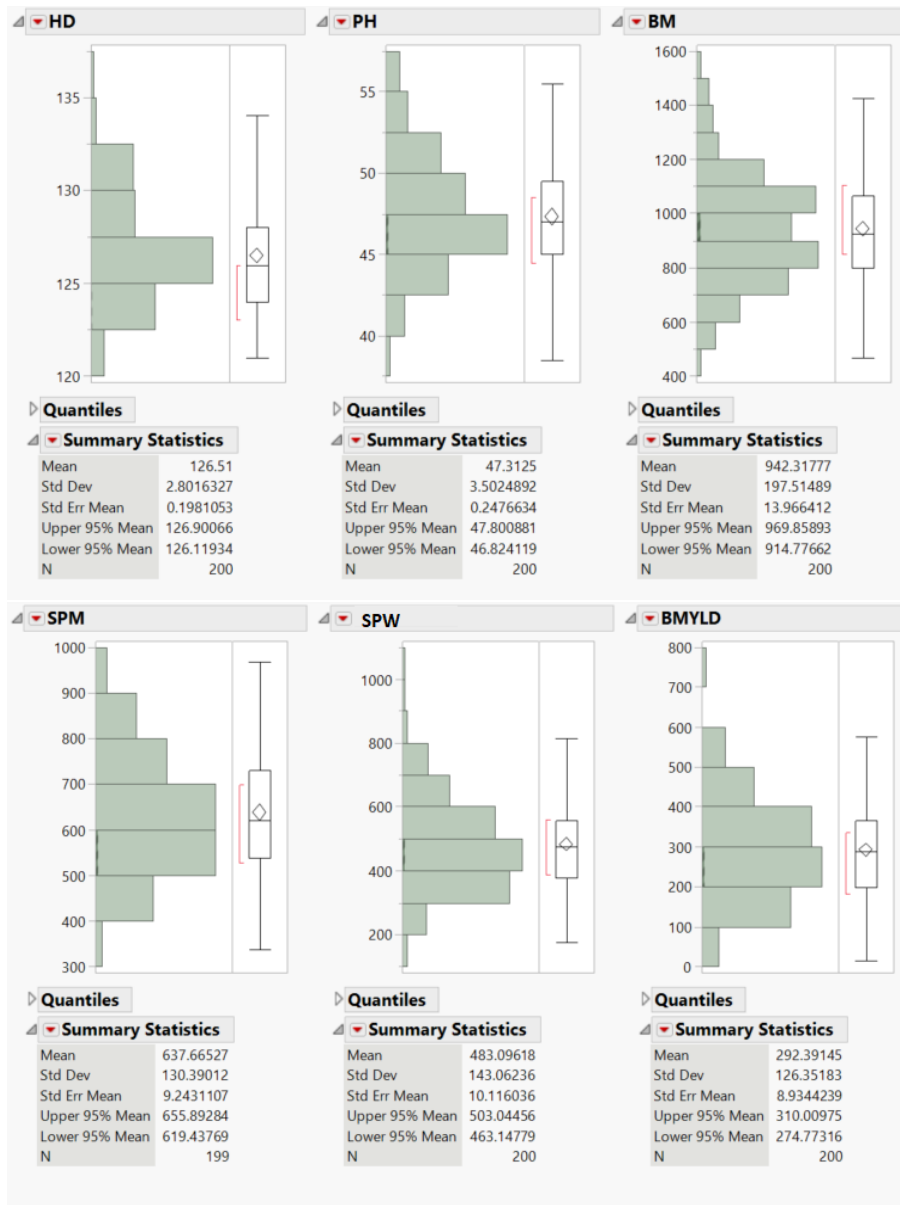

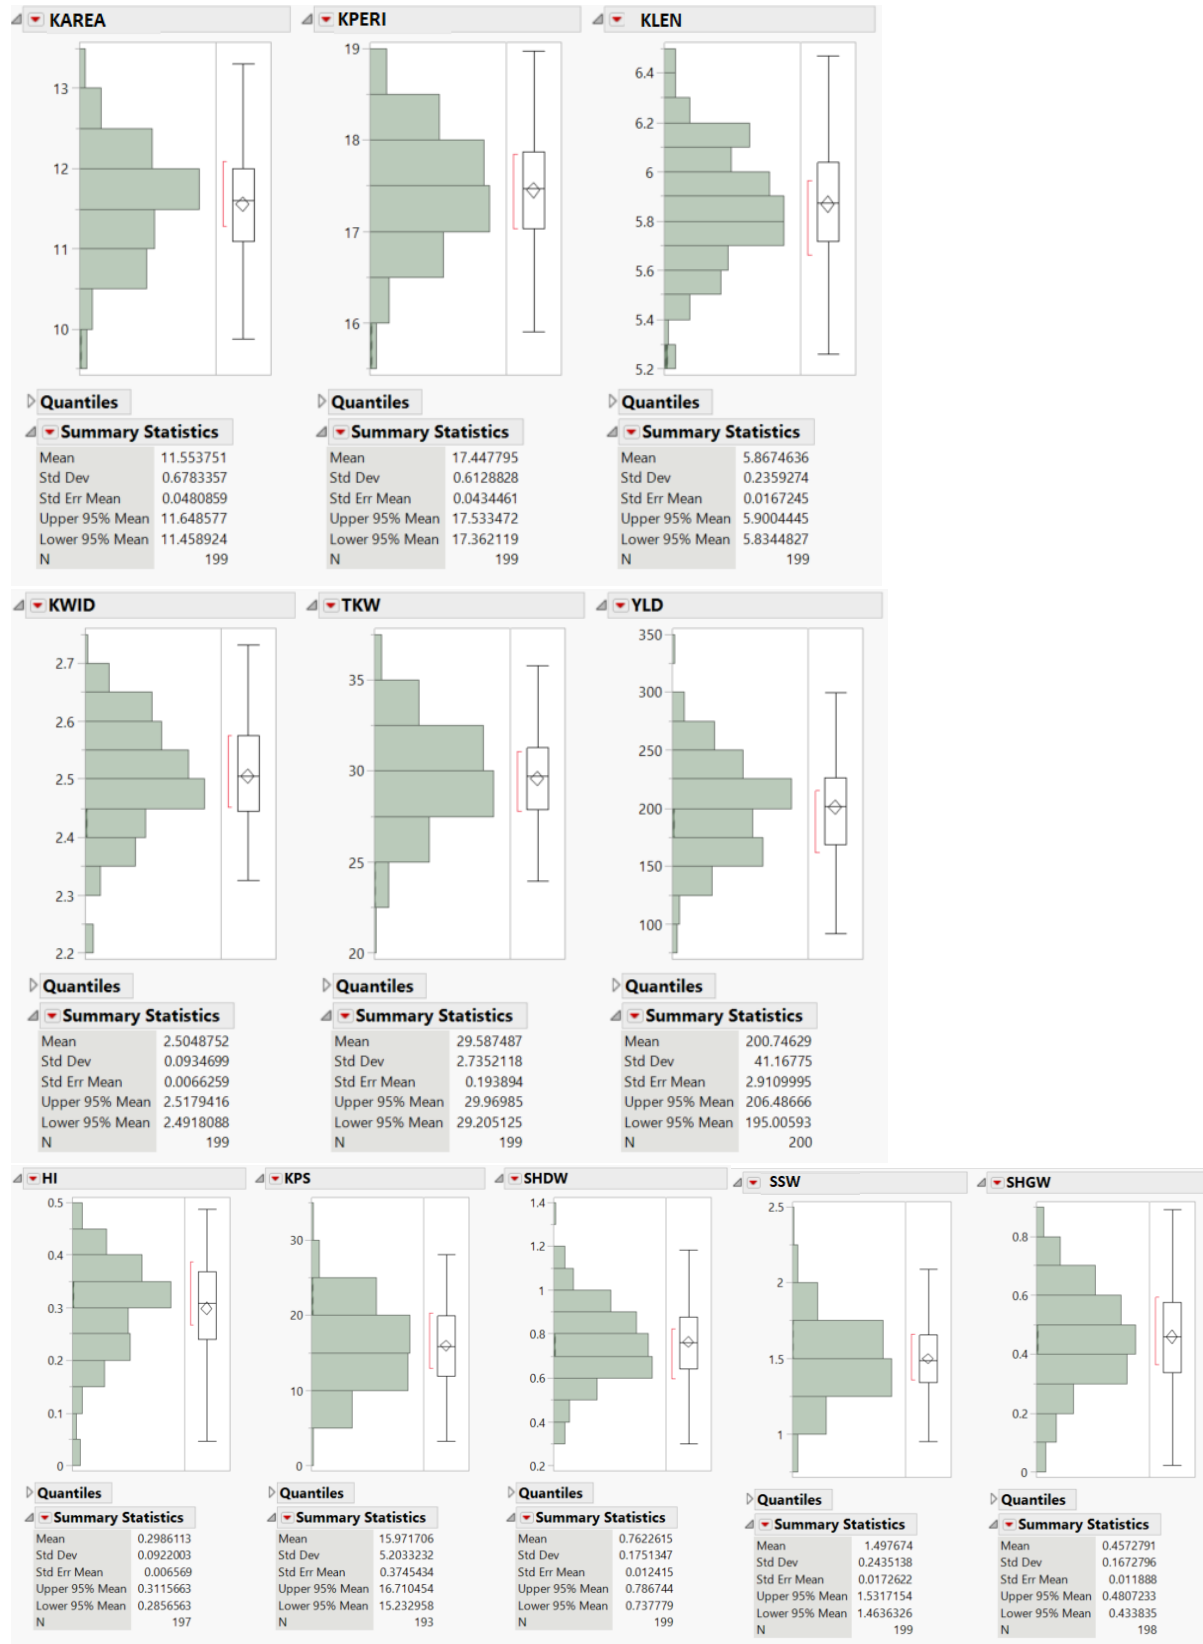

KLEN

Quantiles

Summary Statistics

|                |           |
|----------------|-----------|
| Mean           | 5.8674636 |
| Std Dev        | 0.2359274 |
| Std Err Mean   | 0.0167245 |
| Upper 95% Mean | 5.9004445 |
| Lower 95% Mean | 5.8344827 |
| N              | 199       |

KWID

Quantiles

Summary Statistics

|                |           |
|----------------|-----------|
| Mean           | 2.5048752 |
| Std Dev        | 0.0934699 |
| Std Err Mean   | 0.0066259 |
| Upper 95% Mean | 2.5179416 |
| Lower 95% Mean | 2.4918088 |
| N              | 199       |

TKW

Quantiles

Summary Statistics

|                |           |
|----------------|-----------|
| Mean           | 29.587487 |
| Std Dev        | 2.7352118 |
| Std Err Mean   | 0.193894  |
| Upper 95% Mean | 29.96985  |
| Lower 95% Mean | 29.205125 |
| N              | 199       |

YLD

Quantiles

Summary Statistics

|                |           |
|----------------|-----------|
| Mean           | 200.74629 |
| Std Dev        | 41.16775  |
| Std Err Mean   | 2.9109995 |
| Upper 95% Mean | 206.48666 |
| Lower 95% Mean | 195.00593 |
| N              | 200       |

HI

Quantiles

Summary Statistics

|                |           |
|----------------|-----------|
| Mean           | 0.2986113 |
| Std Dev        | 0.0922003 |
| Std Err Mean   | 0.006569  |
| Upper 95% Mean | 0.3115663 |
| Lower 95% Mean | 0.2856562 |
| N              | 197       |

KPS

Quantiles

Summary Statistics

|                |           |
|----------------|-----------|
| Mean           | 15.971706 |
| Std Dev        | 5.2033232 |
| Std Err Mean   | 0.3745434 |
| Upper 95% Mean | 16.710454 |
| Lower 95% Mean | 15.232958 |
| N              | 193       |

SHDW

Quantiles

Summary Statistics

|                |           |
|----------------|-----------|
| Mean           | 0.7622615 |
| Std Dev        | 0.1751347 |
| Std Err Mean   | 0.012415  |
| Upper 95% Mean | 0.786744  |
| Lower 95% Mean | 0.737779  |
| N              | 199       |

SSW

Quantiles

Summary Statistics

|                |           |
|----------------|-----------|
| Mean           | 1.497674  |
| Std Dev        | 0.2435138 |
| Std Err Mean   | 0.0172622 |
| Upper 95% Mean | 1.5317154 |
| Lower 95% Mean | 1.4636326 |
| N              | 199       |

SHGW

Quantiles

Summary Statistics

|                |           |
|----------------|-----------|
| Mean           | 0.4572791 |
| Std Dev        | 0.1672796 |
| Std Err Mean   | 0.011888  |
| Upper 95% Mean | 0.4807233 |
| Lower 95% Mean | 0.433835  |
| N              | 198       |

**Supplemental Figures S2. Whole genome significance LOD(A) and LOD(AbyE) profiles of quantitative trait loci for yield and yield-related traits based on across all the environments for each trait.** LOD for additive effect LOD(A) is in red, LOD scores of additive by environment LOD(AbyE) is in green; the dotted line paralleled the y-axis separated the 25 linkage groups ( Table S2). The additive effect above the zero line in the bottom figure means that the favorable alleles increasing the traits were from TAM 113, the additive effect below the zero line means QTLs inherited by Gallagher. Abbreviation of traits; **a)** Biomass (BM); **b)** Biomass Grain Yield from 0.5-meter inner row (BMYLD); **c)** Heading Date (HD); **d)** Spikes weight (SPW); **e)** Harvest index (HI); **f)** Kernel Area (KAREA); **g)** Kernels Spike<sup>-1</sup> (KPS); **h)** Kernel Width (KWID); **i)** Kernel Length (KLEN); **j)** Perimeter (PERI); **k)** Plant Height (PH); **l)** Single Head Dry Weight (SHDW); **m)** Single Head Grain Weight (SHGW); **n)** Spikes m<sup>-2</sup> (SPM); **o)** Single Stem Weight (SSW); **p)** Thousand Kernel Weight (TKW); **q)** Grain Yield from combine harvester (YLD).

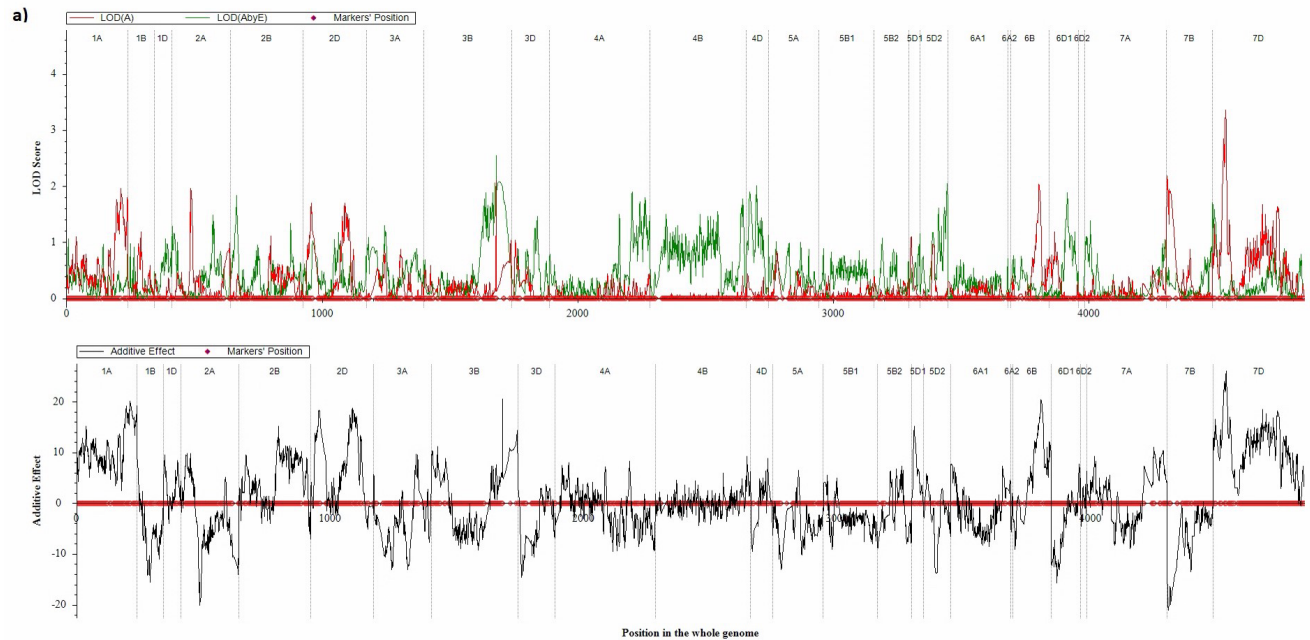

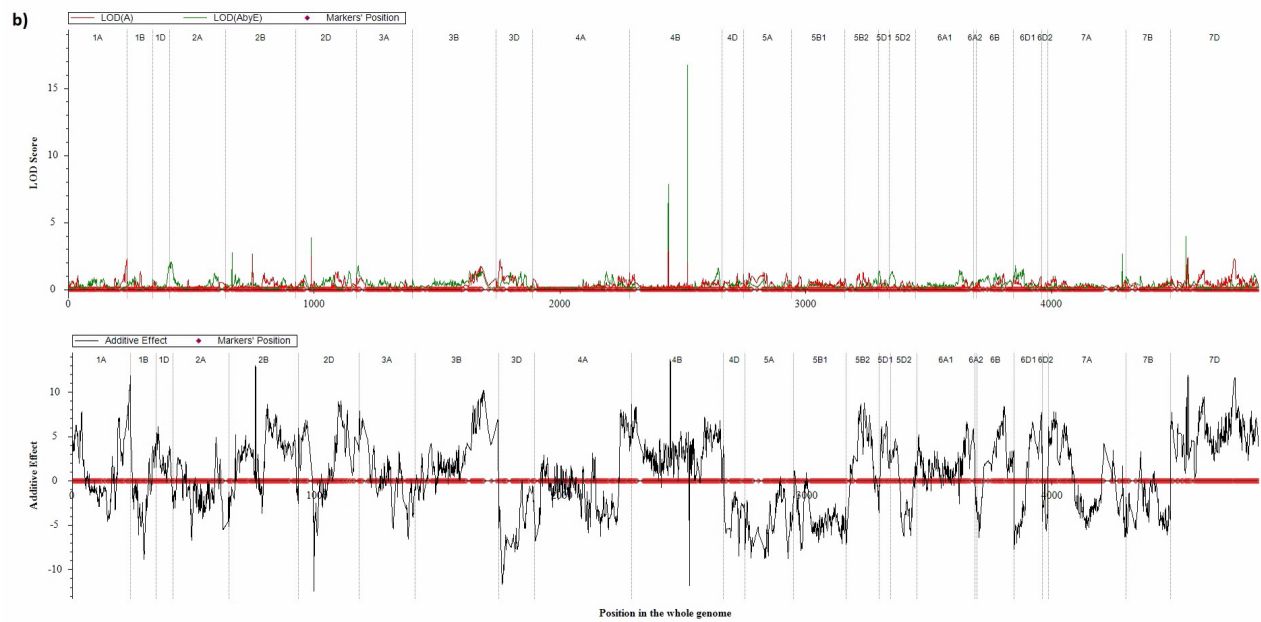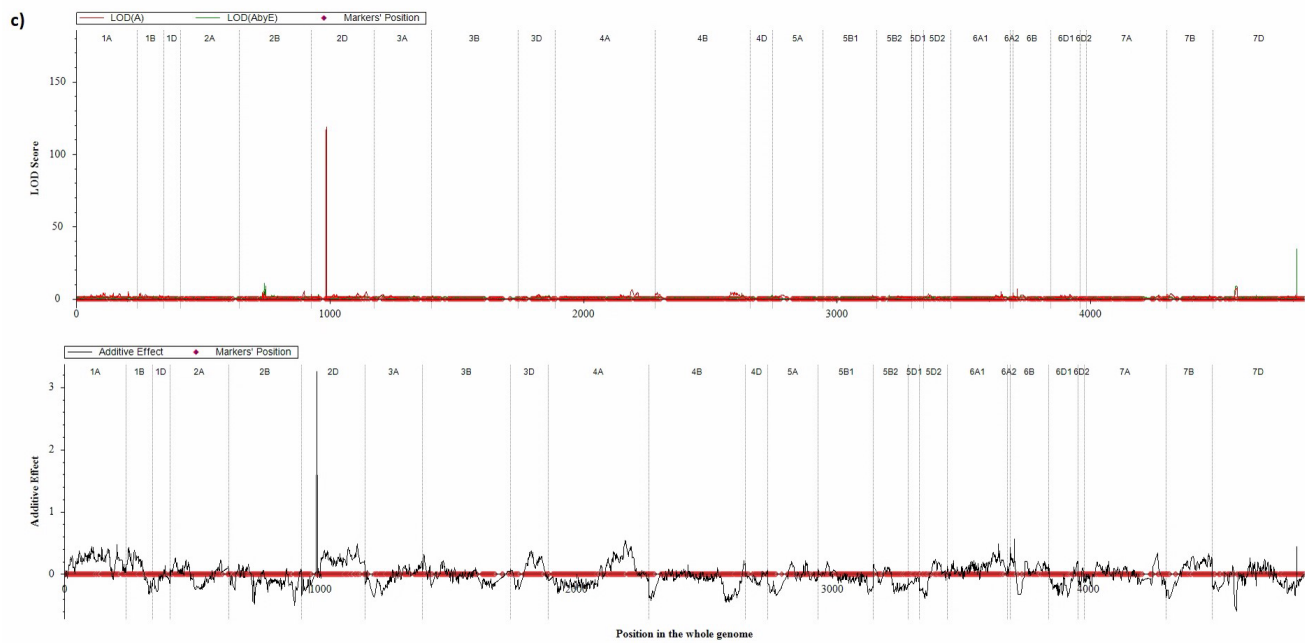

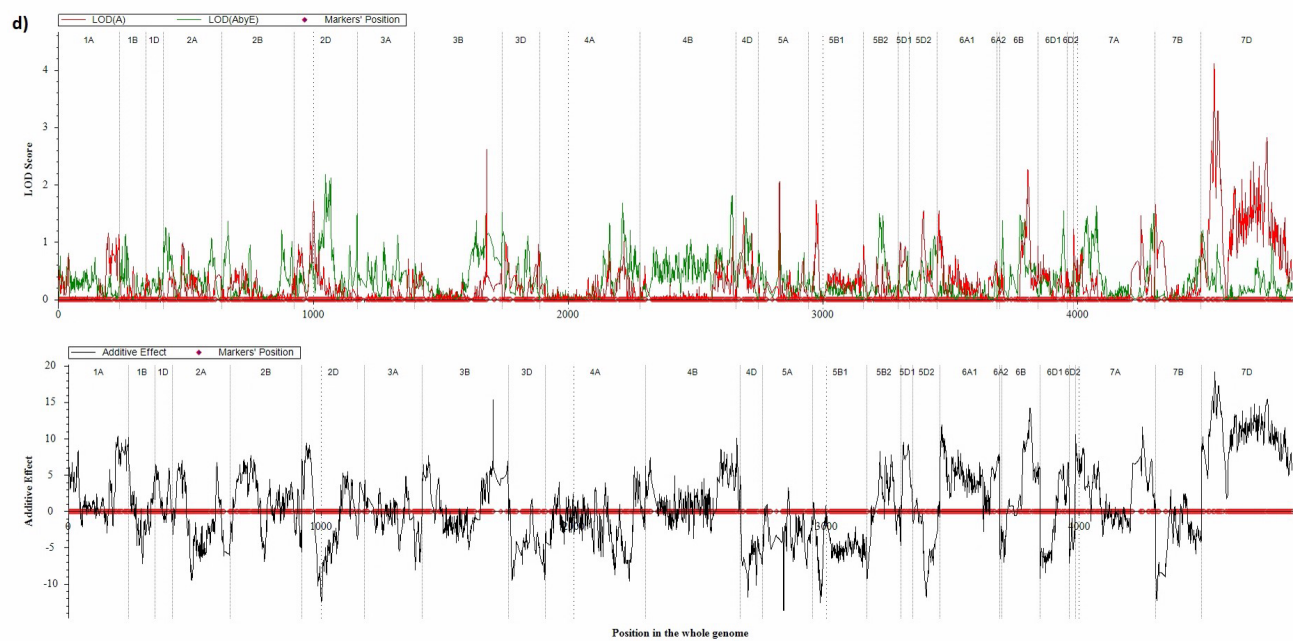

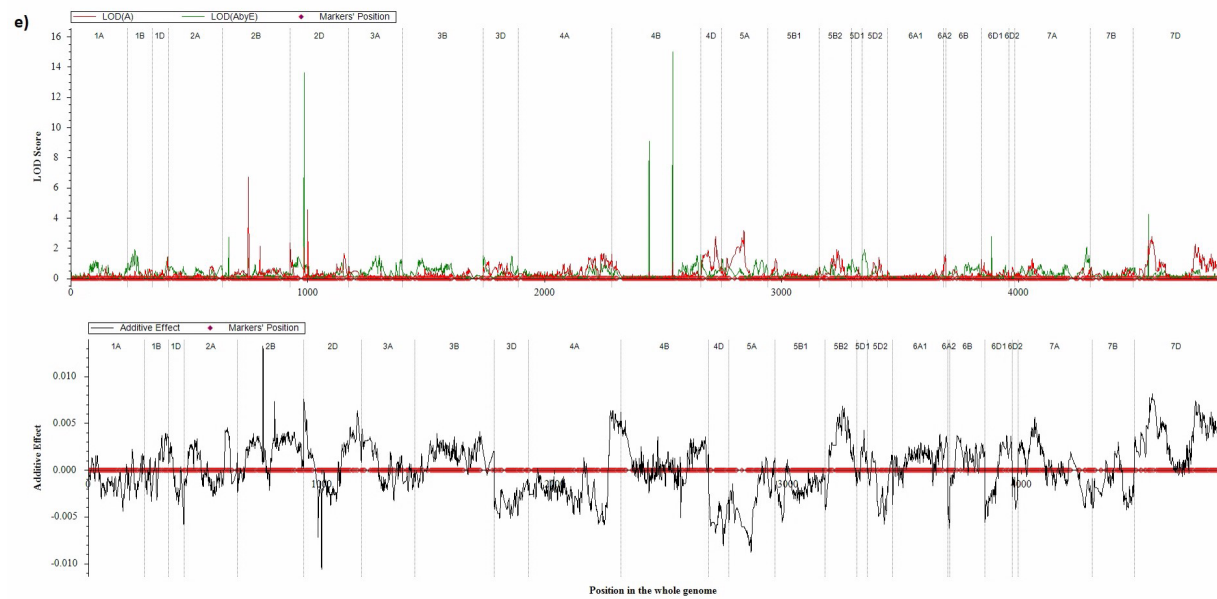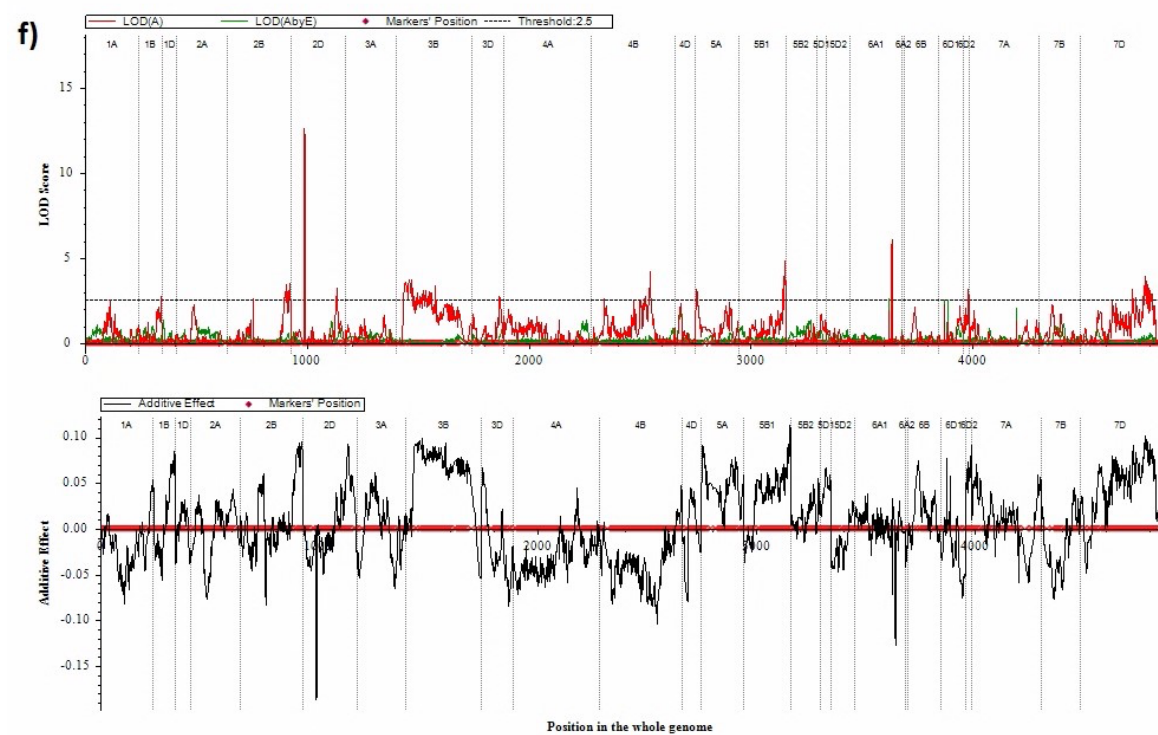



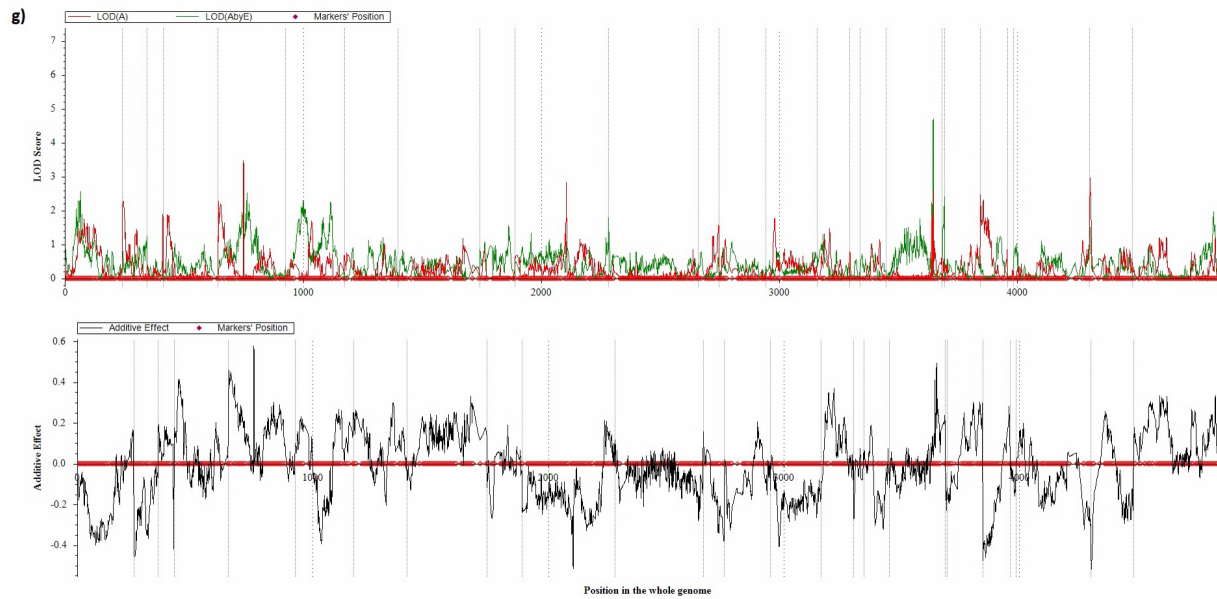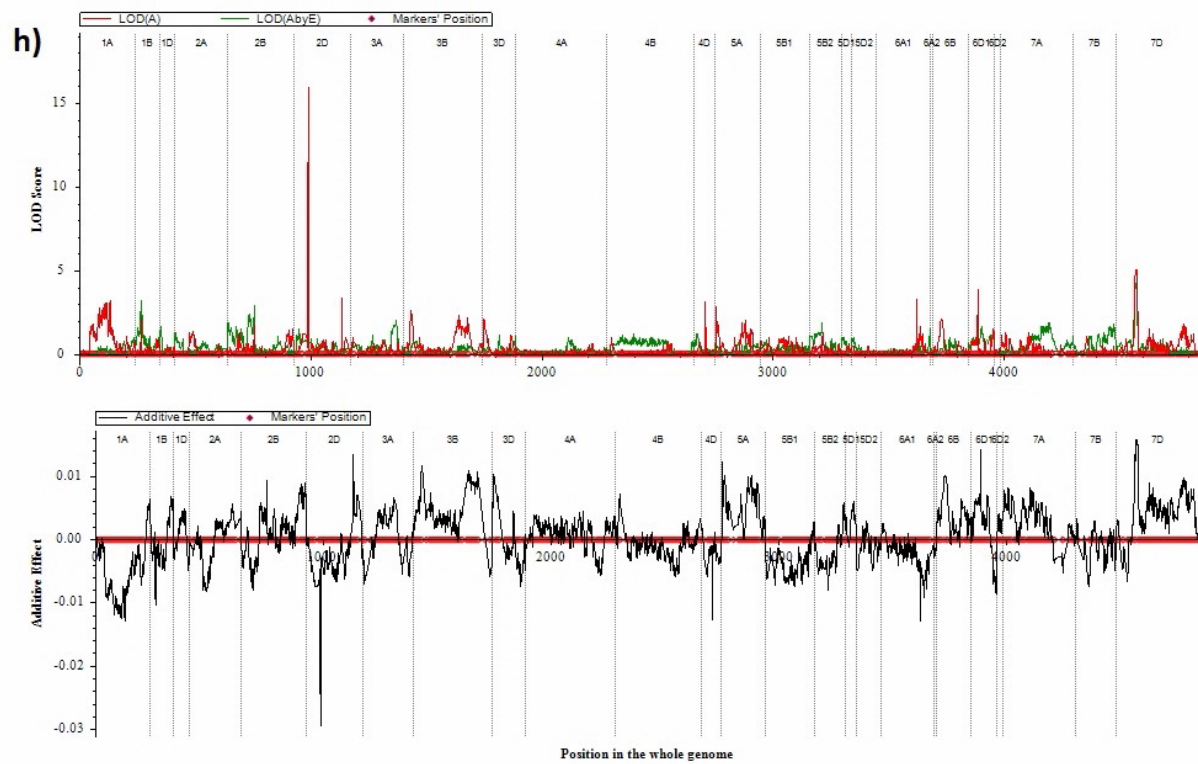

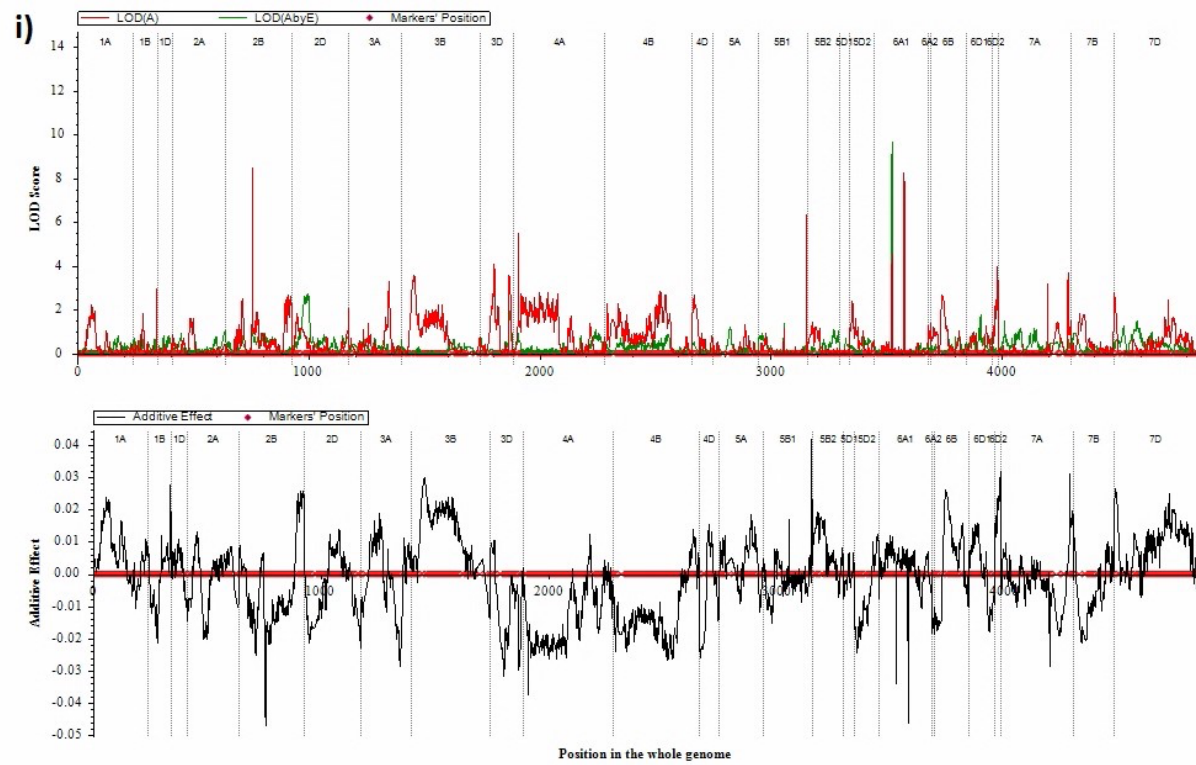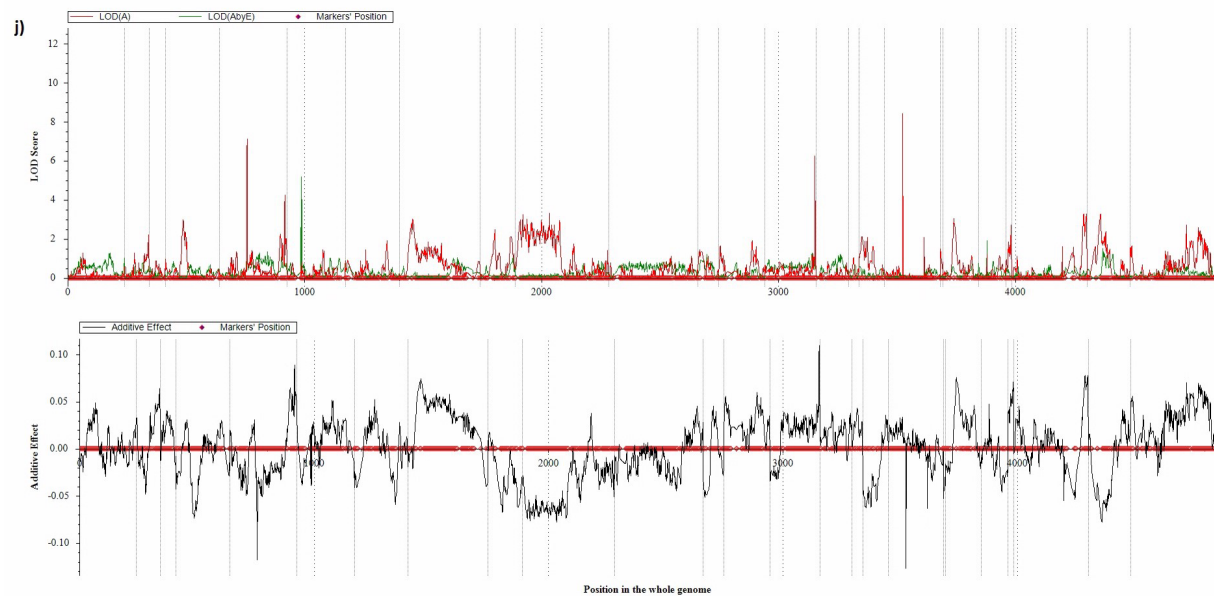

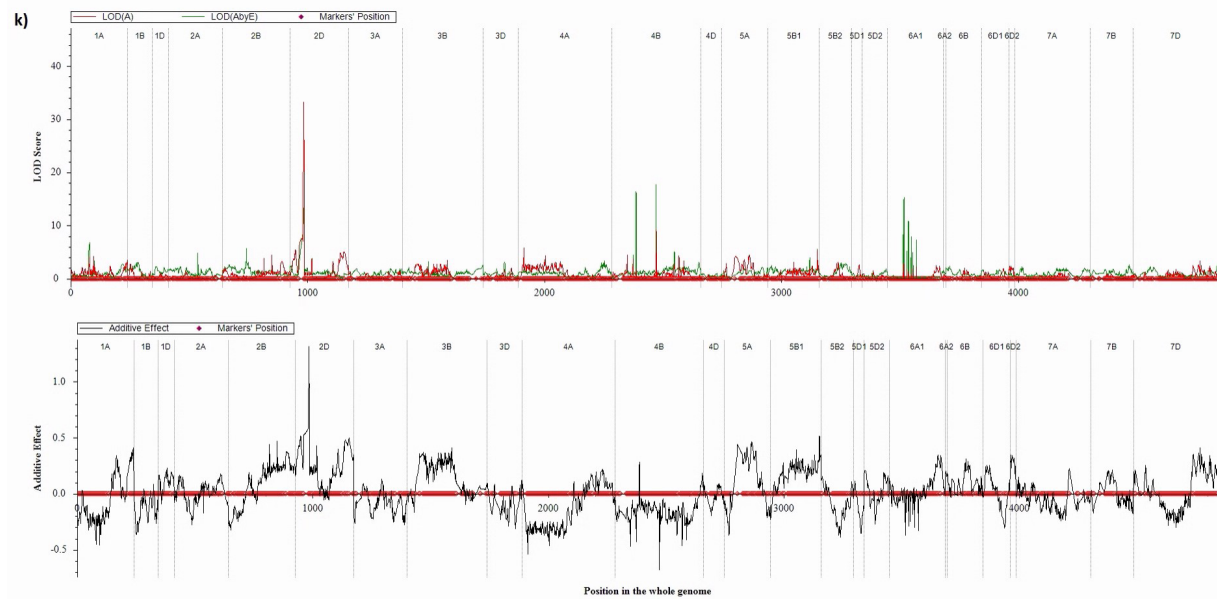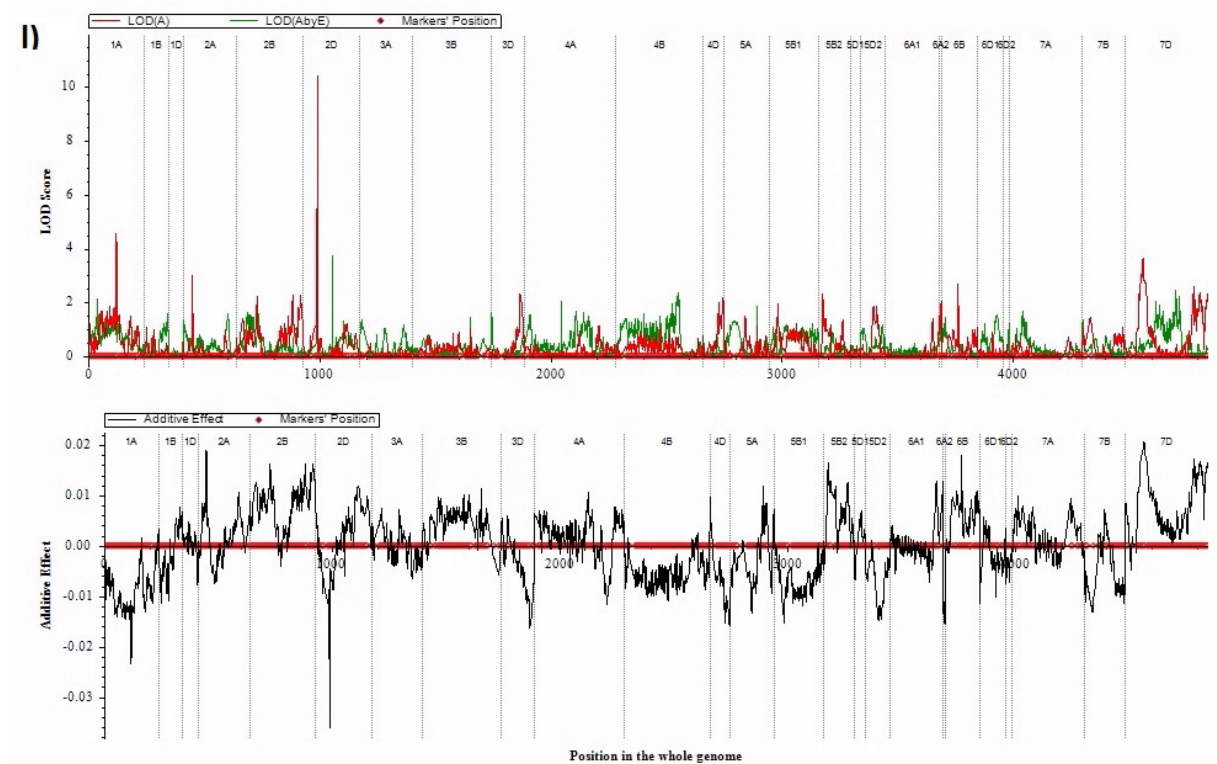

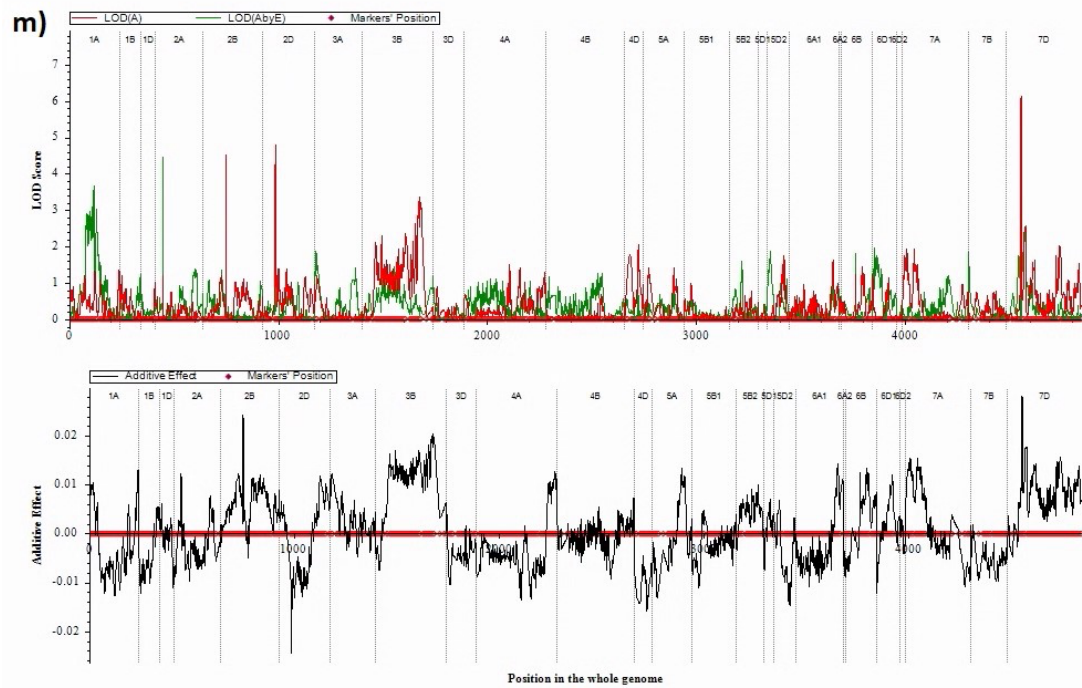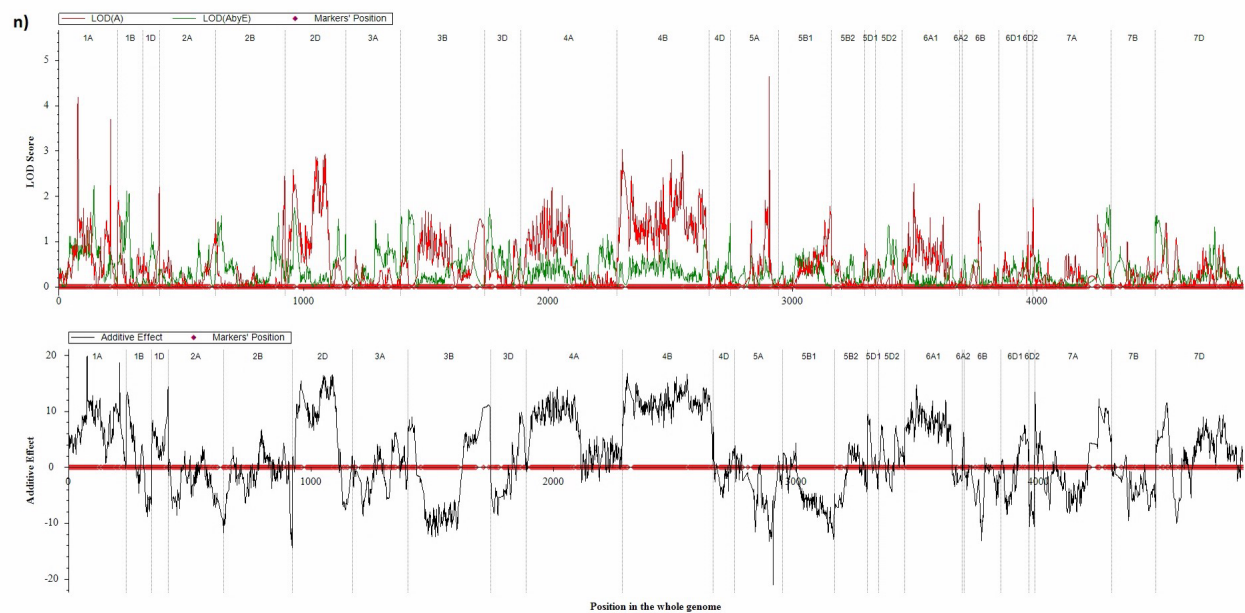



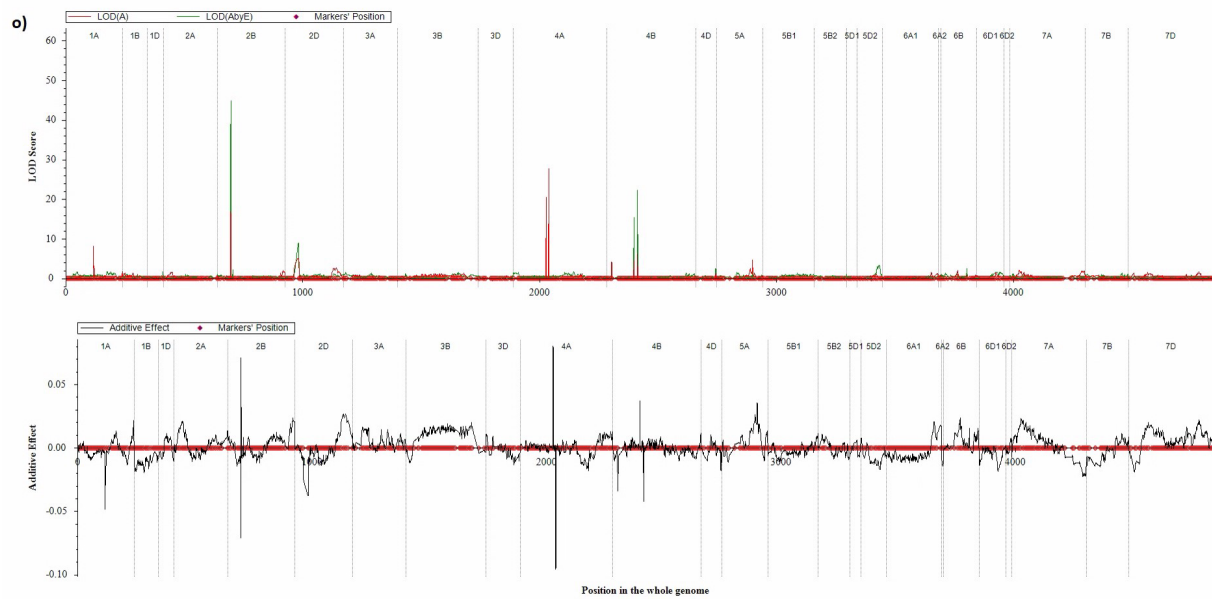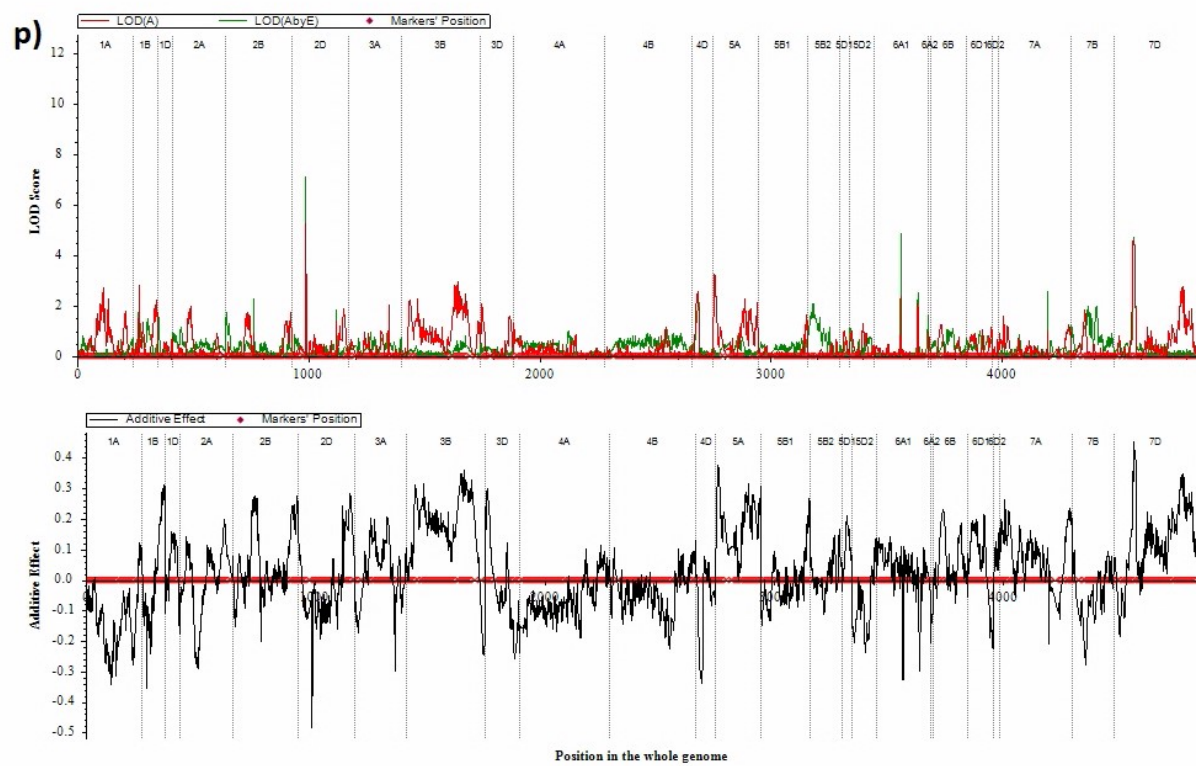

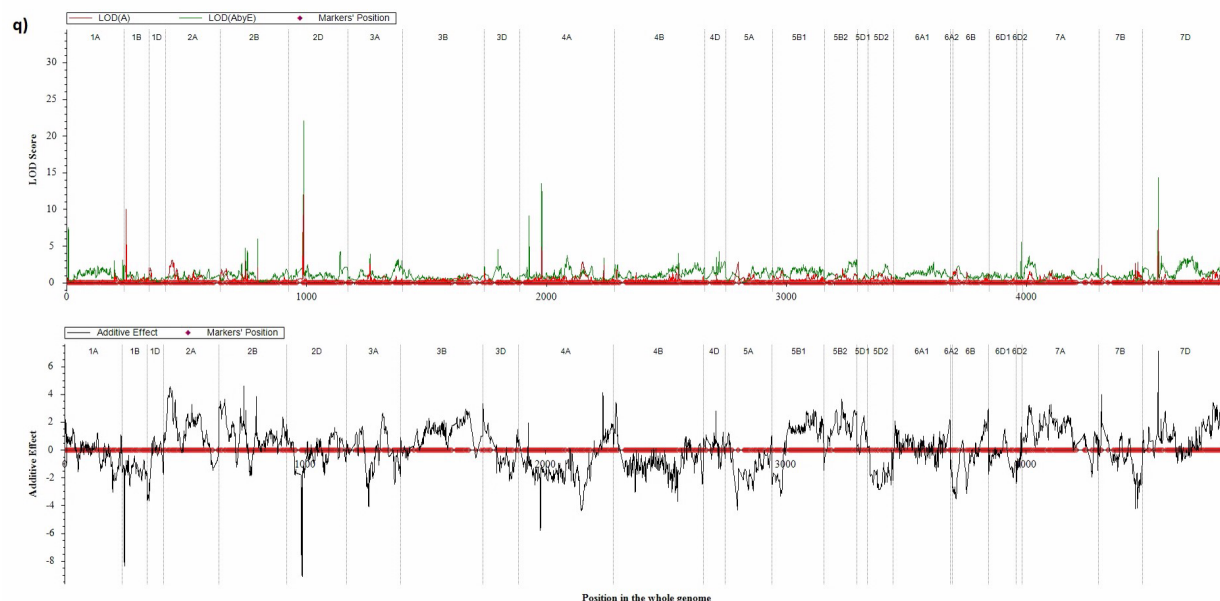

**Supplemental Figures S3. Whole genome significance profiles of epistasis at LOD > 5 for yield and yield-related traits.** The numbers on the rings show the peak cM position of the target SNPs on that chromosome. The numbers on each line show the total LOD score of that epistasis. Detailed information of SNP and its corresponding chromosome and cM locations, LOD scores and percentage of variations explained for total, additive, and additive by environments, additive effects for 1<sup>st</sup> and 2<sup>nd</sup> QTL linked SNPs, their corresponding additive by environment, epistasis by environment were list in Table S6, Abbreviation of traits; **a)** Biomass (BM); **b)** Biomass Grain Yield from the 0.5-meter inner row (BMYLD); **c)** Heading date (HD); **d)** Spikes weight (SPW); **e)** Harvest index (HI); **f)** Kernel Area (KAREA); **g)** Kernels Spike<sup>-1</sup> (KPS); **h)** Kernel Width (KWID); **i)** Kernel Length (KLEN); **j)** Perimeter (KPERI); **k)** Plant Height (PH); **l)** Single Head Dry Weight (SHDW); **m)** Single Head Grain Weight (SHGW); **n)** Spikes m<sup>-2</sup> (SPM); **o)** Single Stem Weight (SSW); **p)** Thousand Kernel Weight (TKW); **q)** Grain Yield from combine harvester (YLD).

a)

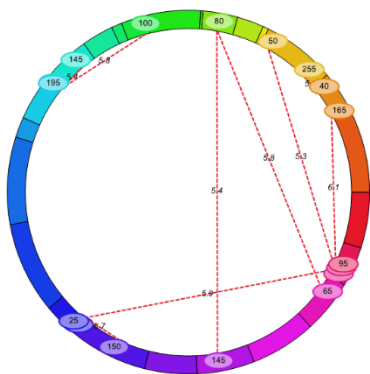

1A 6A2  
1B 6B  
1D 6D1  
2A 6D2  
2B 7A  
2D 7B  
3A 7D  
3B  
3D  
4A  
4B  
4D  
5A  
5B1  
5B2  
5D1  
5D2  
6A1

b)

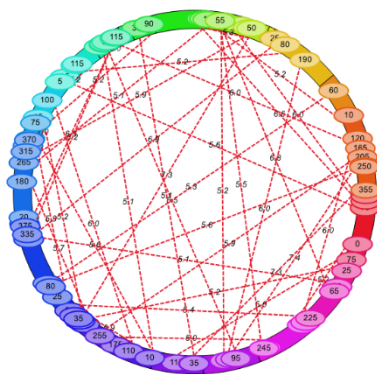

1A 6A2  
1B 6B  
1D 6D1  
2A 6D2  
2B 7A  
2D 7B  
3A 7D  
3B  
3D  
4A  
4B  
4D  
5A  
5B1  
5B2  
5D1  
5D2  
6A1

c)

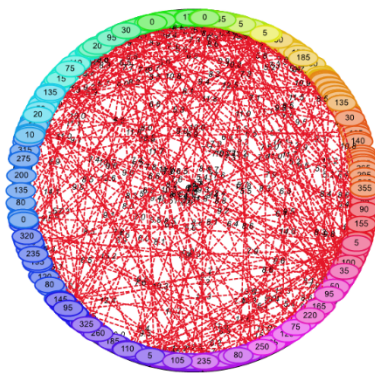

1A 6A2  
1B 6B  
1D 6D1  
2A 6D2  
2B 7A  
2D 7B  
3A 7D  
3B  
3D  
4A  
4B  
4D  
5A  
5B1  
5B2  
5D1  
5D2  
6A1

d)

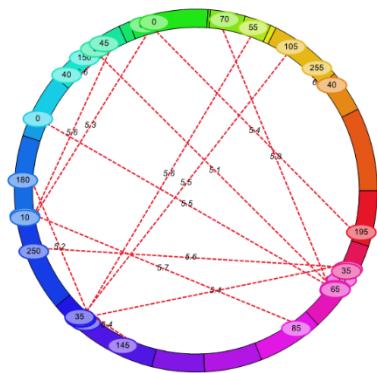

1A 6A2  
1B 6B  
1D 6D1  
2A 6D2  
2B 7A  
2D 7B  
3A 7D  
3B  
3D  
4A  
4B  
4D  
5A  
5B1  
5B2  
5D1  
5D2  
6A1

e)

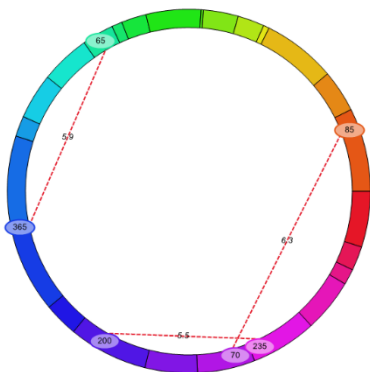

1A 6A2  
1B 6B  
1D 6D1  
2A 6D2  
2B 7A  
2D 7B  
3A 7D  
3B  
3D  
4A  
4B  
4D  
5A  
5B1  
5B2  
5D1  
5D2  
6A1

f)

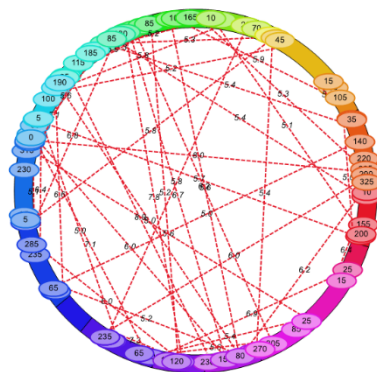

1A 6A2  
1B 6B  
1D 6D1  
2A 6D2  
2B 7A  
2D 7B  
3A 7D  
3B  
3D  
4A  
4B  
4D  
5A  
5B1  
5B2  
5D1  
5D2  
6A1

g)

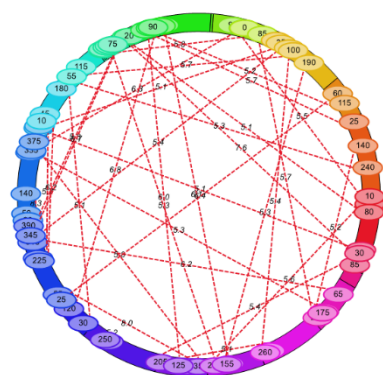

1A 6A2  
1B 6B  
1D 6D1  
2A 6D2  
2B 7A  
2D 7B  
3A 7D  
3B  
3D  
4A  
4B  
4D  
5A  
5B1  
5B2  
5D1  
5D2  
6A1

h)

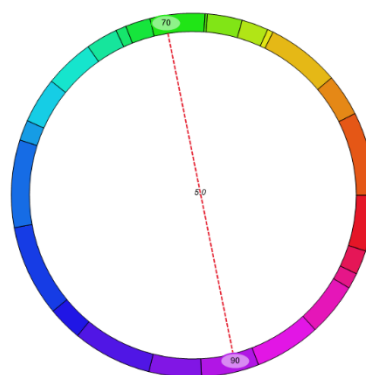

1A 6A2  
1B 6B  
1D 6D1  
2A 6D2  
2B 7A  
2D 7B  
3A 7D  
3B  
3D  
4A  
4B  
4D  
5A  
5B1  
5B2  
5D1  
5D2  
6A1

i)

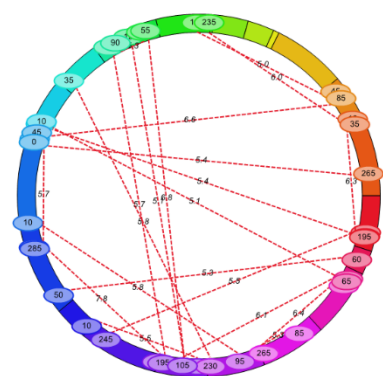

1A 6A2  
1B 6B  
1D 6D1  
2A 6D2  
2B 7A  
2D 7B  
3A 7D  
3B  
3D  
4A  
4B  
4D  
5A  
5B1  
5B2  
5D1  
5D2  
6A1

j)

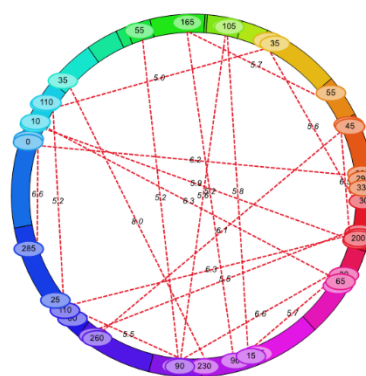

1A 6A2  
1B 6B  
1D 6D1  
2A 6D2  
2B 7A  
2D 7B  
3A 7D  
3B  
3D  
4A  
4B  
4D  
5A  
5B1  
5B2  
5D1  
5D2  
6A1

k)

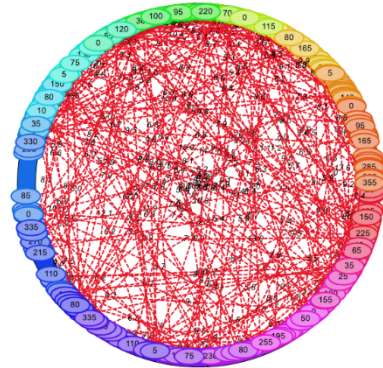

1A 6A2  
1B 6B  
1D 6D1  
2A 6D2  
2B 7A  
2D 7B  
3A 7D  
3B  
3D  
4A  
4B  
4D  
5A  
5B1  
5B2  
5D1  
5D2  
6A1

l)

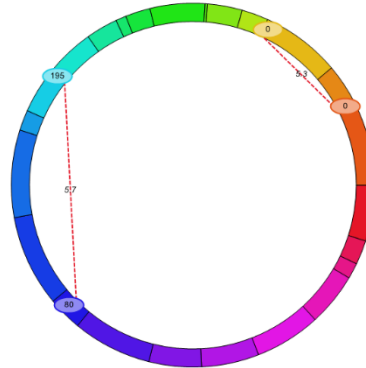

1A 6A2  
1B 6B  
1D 6D1  
2A 6D2  
2B 7A  
2D 7B  
3A 7D  
3B  
3D  
4A  
4B  
4D  
5A  
5B1  
5B2  
5D1  
5D2  
6A1



m)

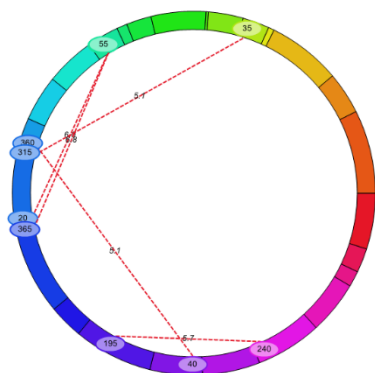

1A 6A2  
1B 6B  
1D 6D1  
2A 6D2  
2B 7A  
2D 7B  
3A 7D  
3B  
3D  
4A  
4B  
4D  
5A  
5B1  
5B2  
5D1  
5D2  
6A1

n)

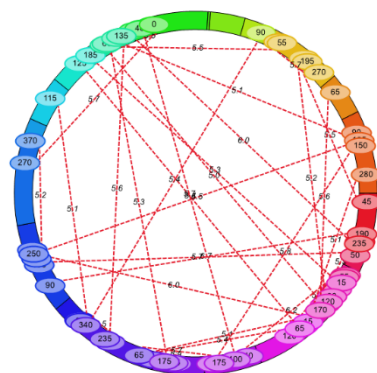

1A 6A2  
1B 6B  
1D 6D1  
2A 6D2  
2B 7A  
2D 7B  
3A 7D  
3B  
3D  
4A  
4B  
4D  
5A  
5B1  
5B2  
5D1  
5D2  
6A1

o)

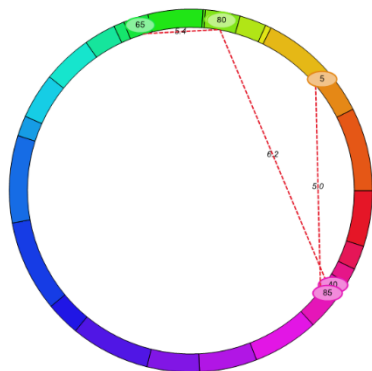

1A 6A2  
1B 6B  
1D 6D1  
2A 6D2  
2B 7A  
2D 7B  
3A 7D  
3B  
3D  
4A  
4B  
4D  
5A  
5B1  
5B2  
5D1  
5D2  
6A1

p)

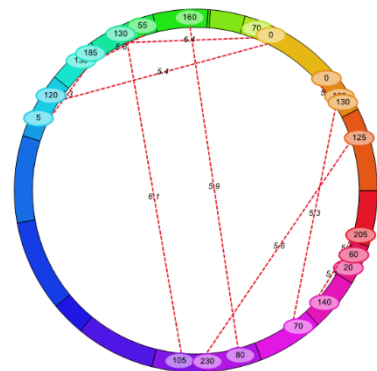

1A 6A2  
1B 6B  
1D 6D1  
2A 6D2  
2B 7A  
2D 7B  
3A 7D  
3B  
3D  
4A  
4B  
4D  
5A  
5B1  
5B2  
5D1  
5D2  
6A1

q)

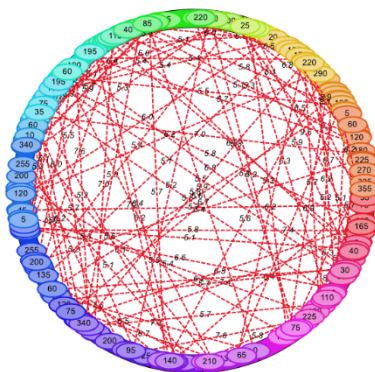

1A 6A2  
1B 6B  
1D 6D1  
2A 6D2  
2B 7A  
2D 7B  
3A 7D  
3B  
3D  
4A  
4B  
4D  
5A  
5B1  
5B2  
5D1  
5D2  
6A1
